# Supplementary material for: Strategies for Conservative and Non-Conservative Monotone Remapping on the Sphere
Source: Copernicus journal article supplement (doi:10.5194/gmd-2022-248), 2022-10-17
Supplement: Supplementary file [file gmd-2022-248-AC2-supplement.zip]

# Illustration of the Delaunay triangulation scheme

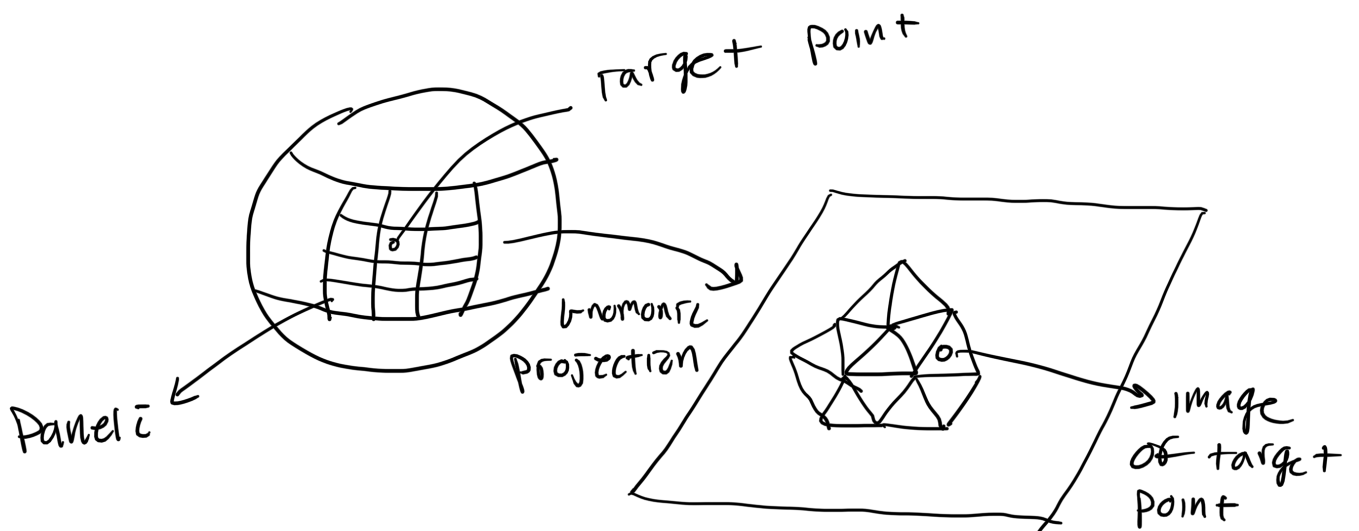

The faces of panel  $i$  are projected onto a tangent plane and then triangulated
