# Supplementary material for: Strategies for Conservative and Non-Conservative Monotone Remapping on the Sphere
Source: Copernicus journal article supplement (doi:10.5194/gmd-2022-248), 2022-10-17

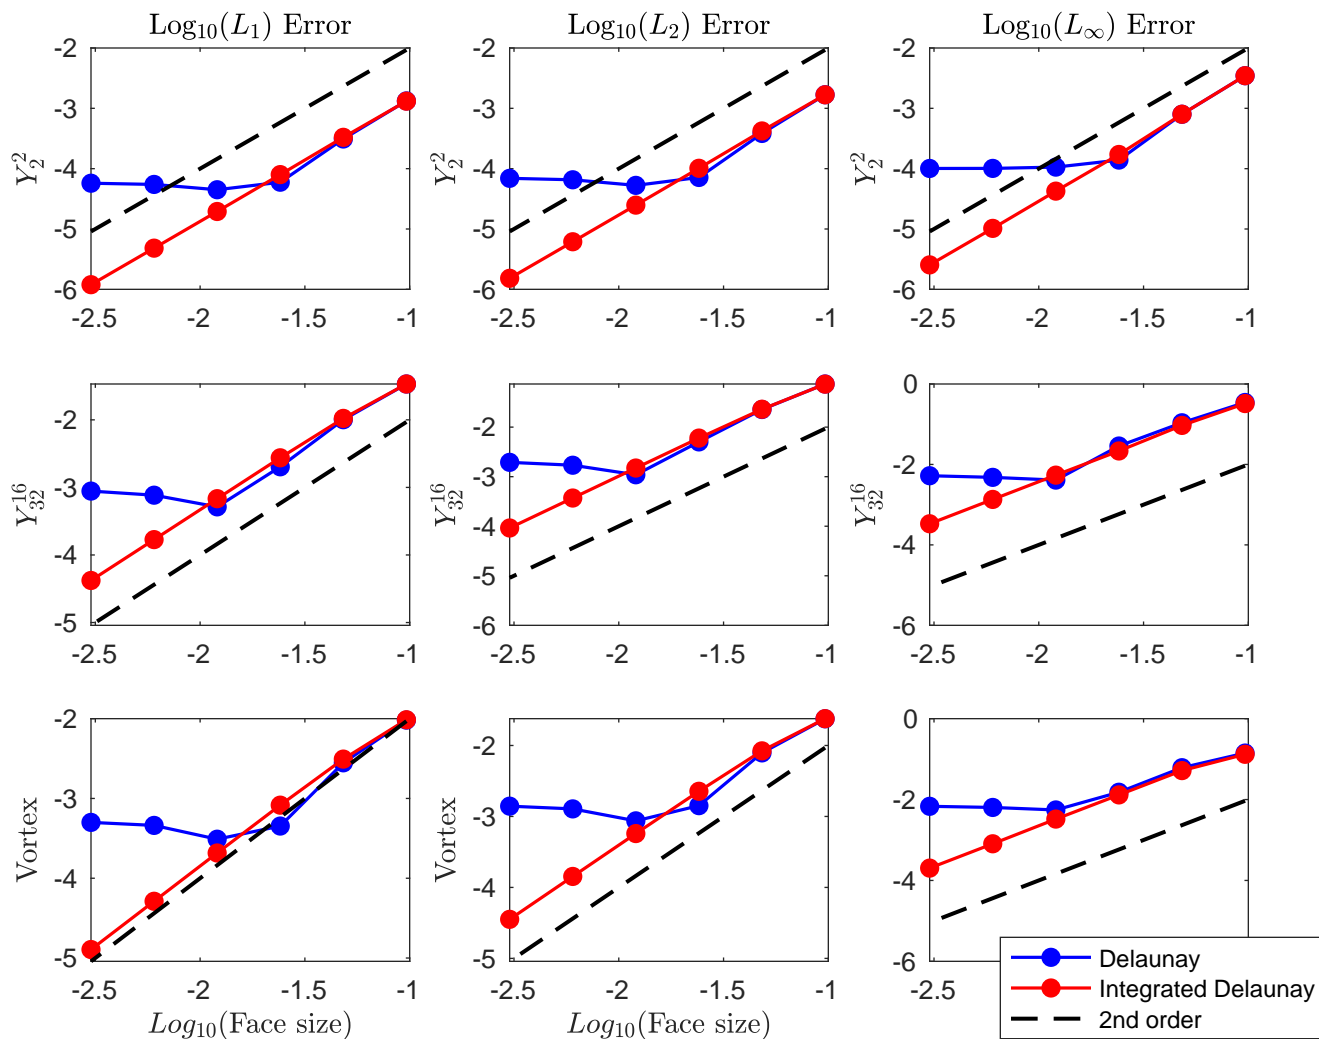

Supplement: Supplementary file [file gmd-2022-248-AC2-supplement.zip]
